# Supplementary material for: Rational design of organic semiconductors with low internal reorganization energies for hole and electron transport: position effect of aza-substitution in phenalenyl derivatives
Source: Royal Society of Chemistry journal article supplement (doi:10.1039/d1cp02902a), 2021-01-01
Supplement: d1cp02902a4.pdf [file d1cp02902a4.pdf]

# Supplementary Information

## **Rational Design of Organic Semiconductors with Low Internal Reorganization Energies for Hole and Electron Transport: Position Effect of Aza-Substitution in Phenalenyl Derivatives**

Wei-Chih Chen<sup>a</sup> and Yu-Chang Chang<sup>b\*</sup>

<sup>a</sup>Department of Chemistry, National Taiwan University, Taipei, 10617, Taiwan

<sup>b</sup>Department of Applied Chemistry, Providence University, 200, Sec. 7, Taiwan Boulevard,  
Shalu Dist., Taichung 43301, Taiwan.

Email: [vickchang@pu.edu.tw](mailto:vickchang@pu.edu.tw)

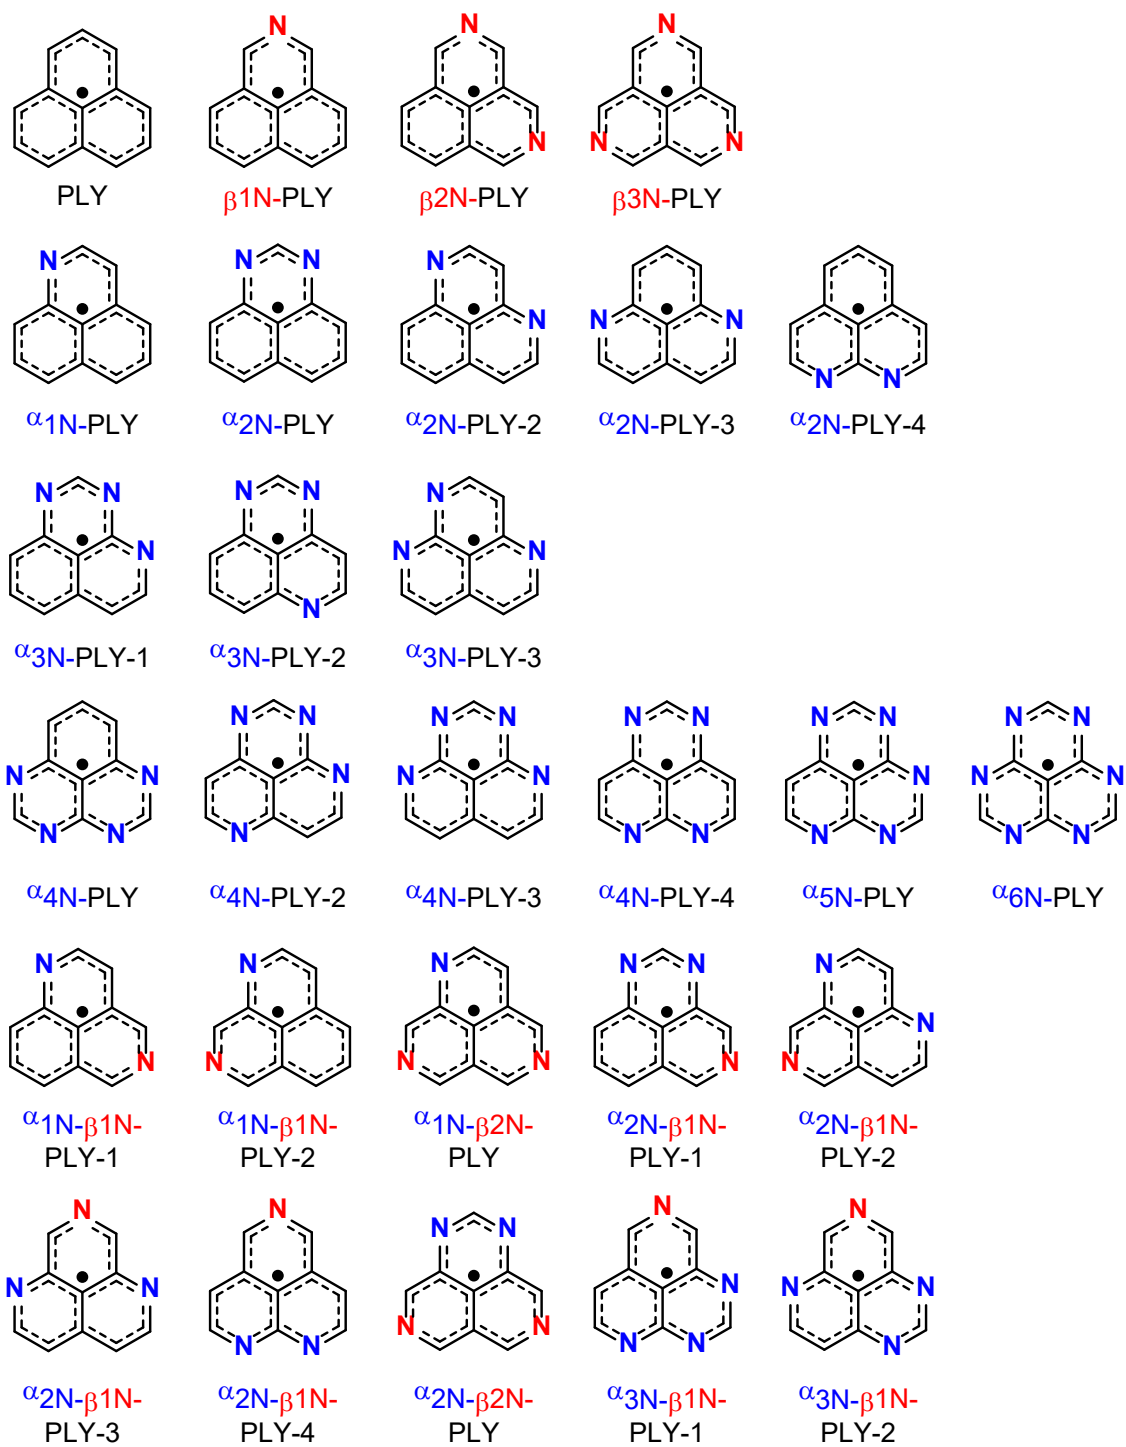

**Figure S1.** Molecular structures for PLY and its aza-derivatives.

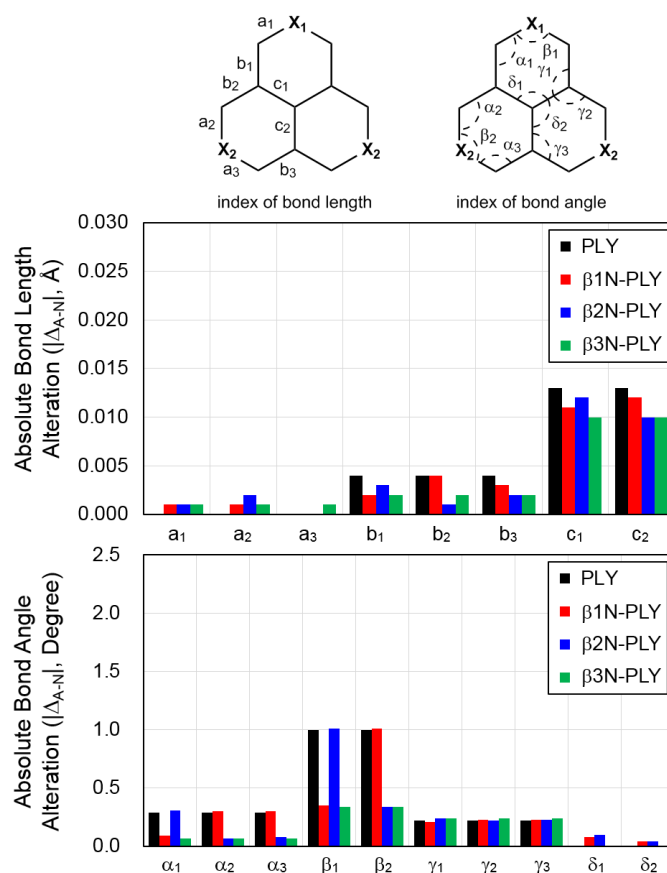

**Figure S2.** Schematic illustrations of bond length and bond angle alterations between the anionic and neutral states for PLY and  $\beta$ -substituted aza-PLYs.

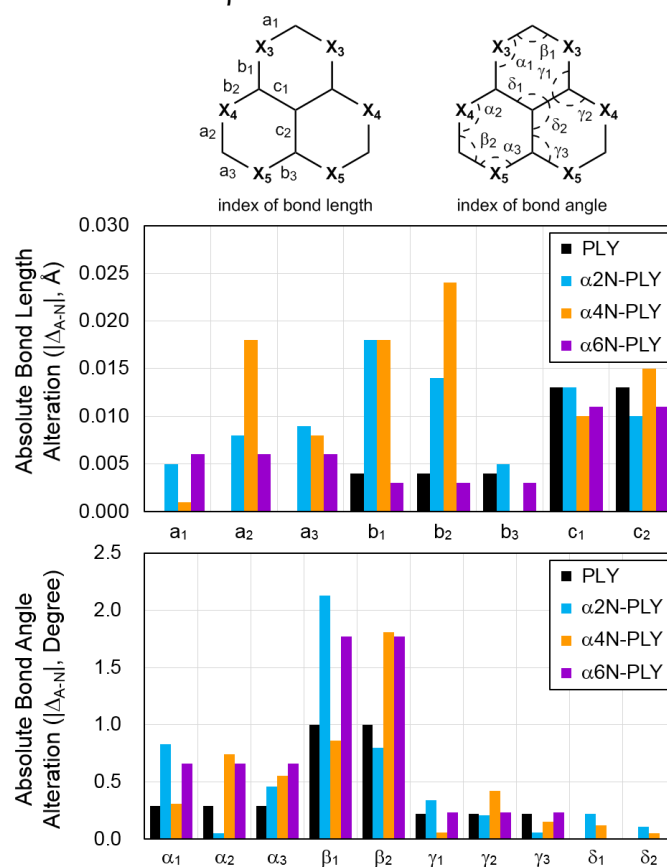

**Figure S3.** Schematic illustrations of bond length and bond angle alterations between the anionic and neutral states for PLY and  $\alpha$ -substituted aza-PLYs.

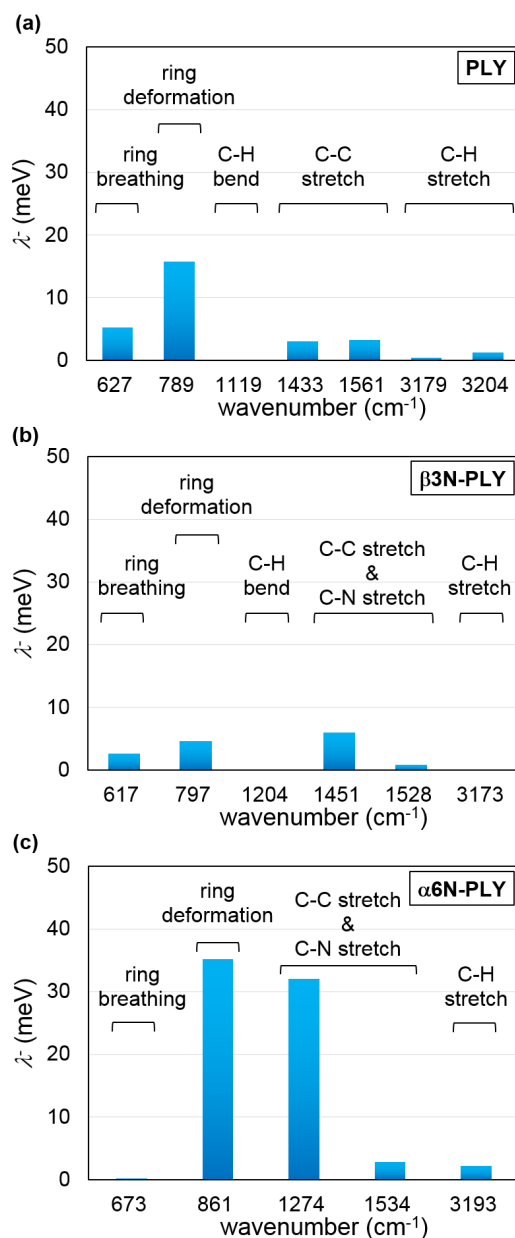

**Figure S4.** Calculated  $\lambda_{\bar{r}}$ s of each totally symmetric vibrational mode for PLY,  $\beta$ 3N-PLY and  $\alpha$ 6N-PLY.

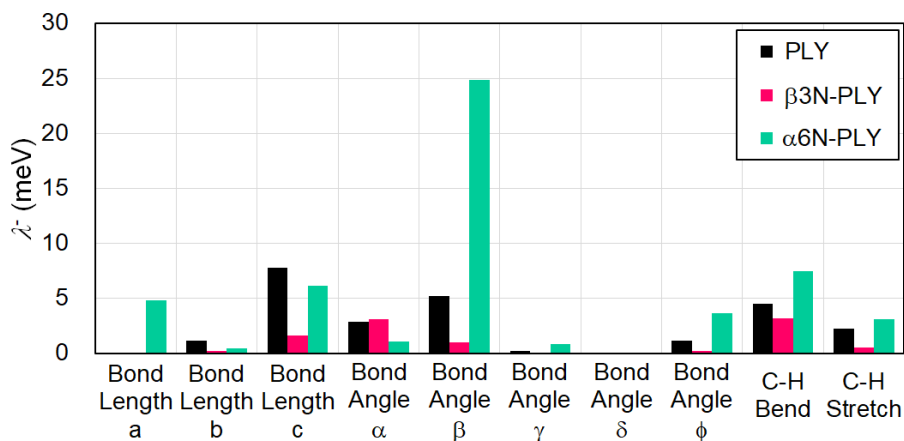

**Figure S5.** Decomposition of  $\lambda_{\bar{r}}$  into the internal coordinates for PLY,  $\beta$ 3N-PLY and  $\alpha$ 6N-PLY. The detailed data are listed in Table S5 to S7.

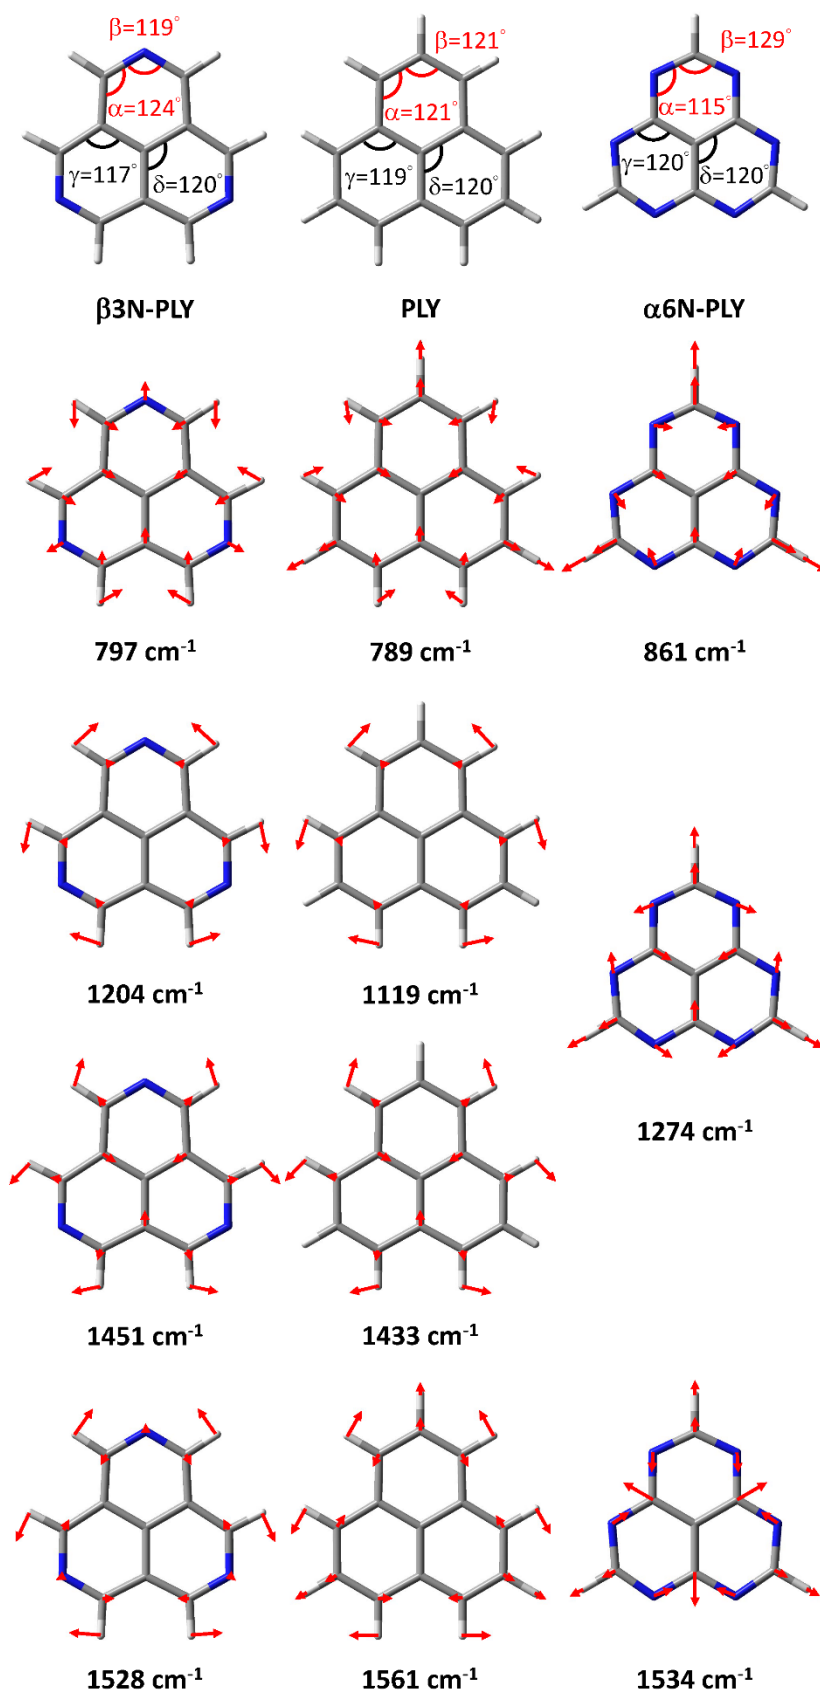

**Figure S6.** Totally symmetric vibrational normal modes for PLY,  $\beta$ 3N-PLY and  $\alpha$ 6N-PLY. Aminations for these vibrational modes are attached in the Supplementary Information.

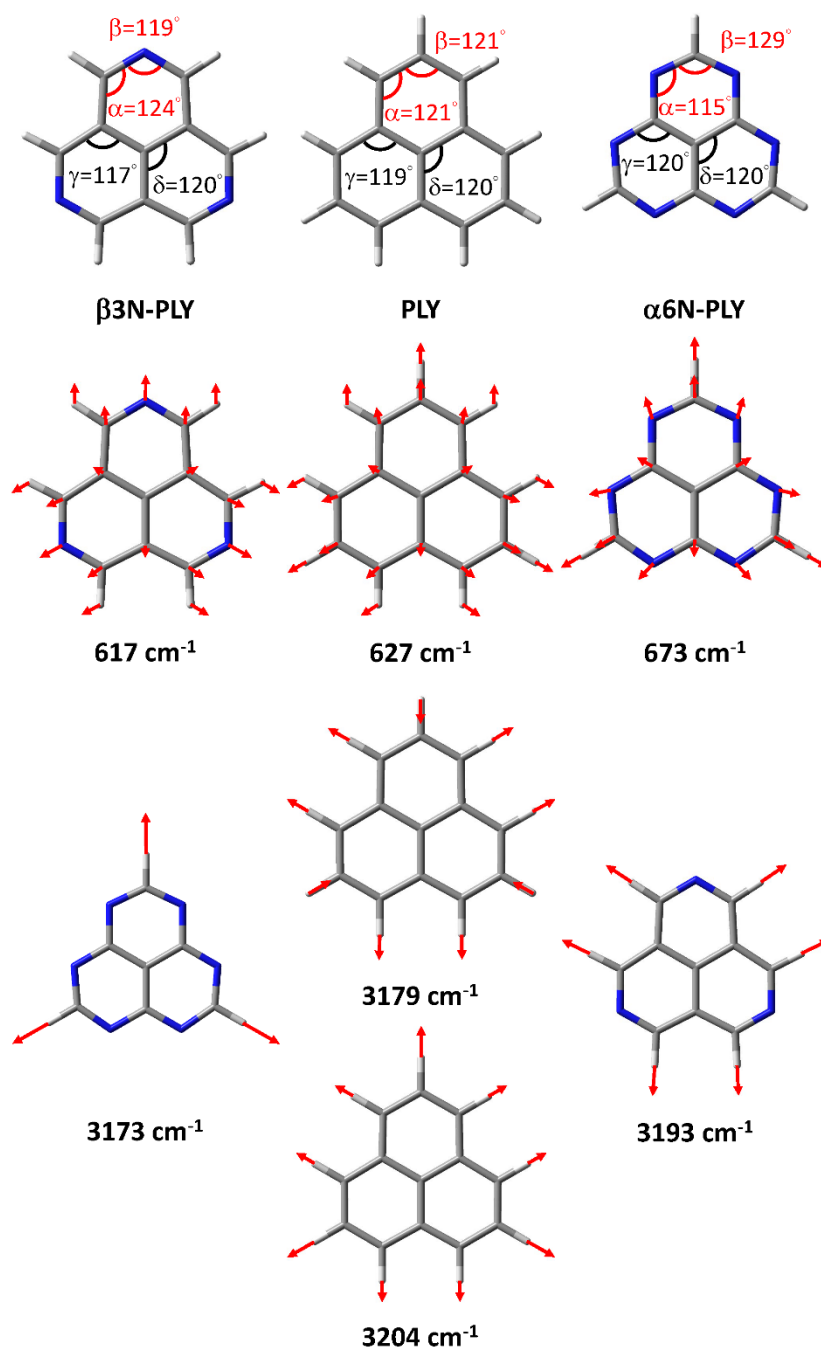

**Figure S6 (continued).** Totally symmetric vibrational normal modes for PLY,  $\beta$ 3N-PLY and  $\alpha$ 6N-PLY.

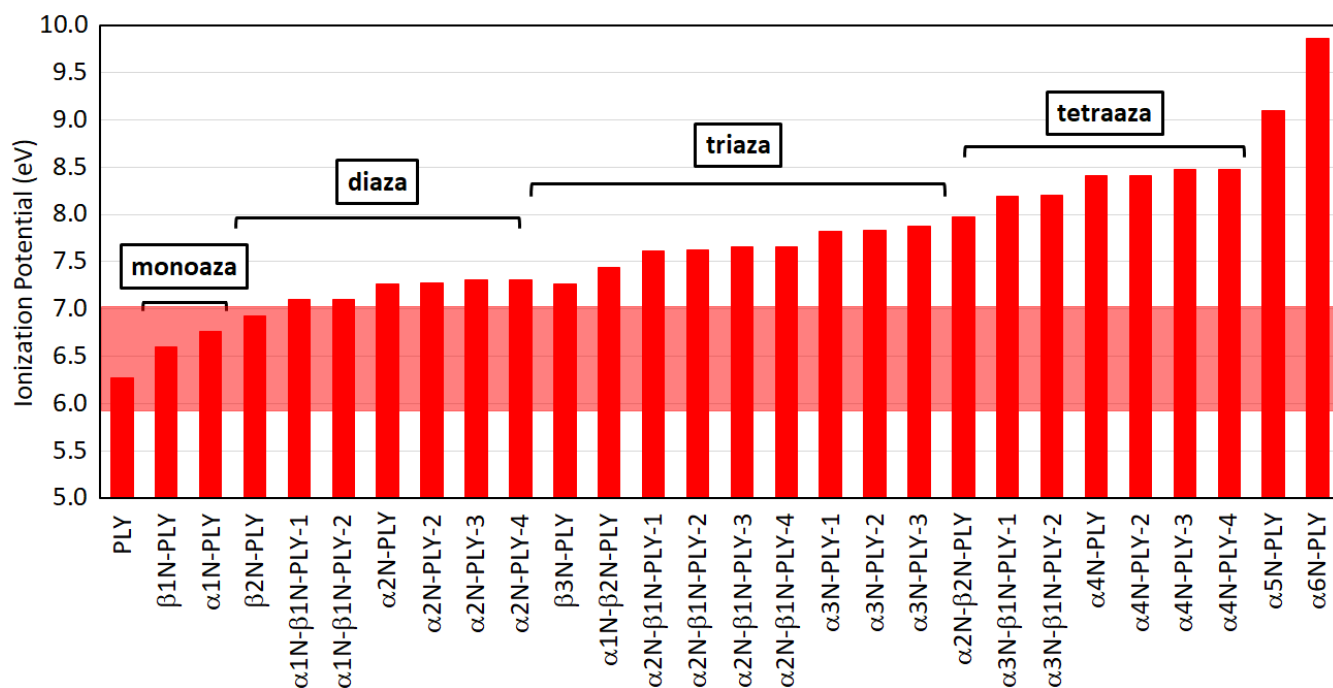

**Figure S7.** Ionization potential (IP) for PLY and its aza-derivatives.

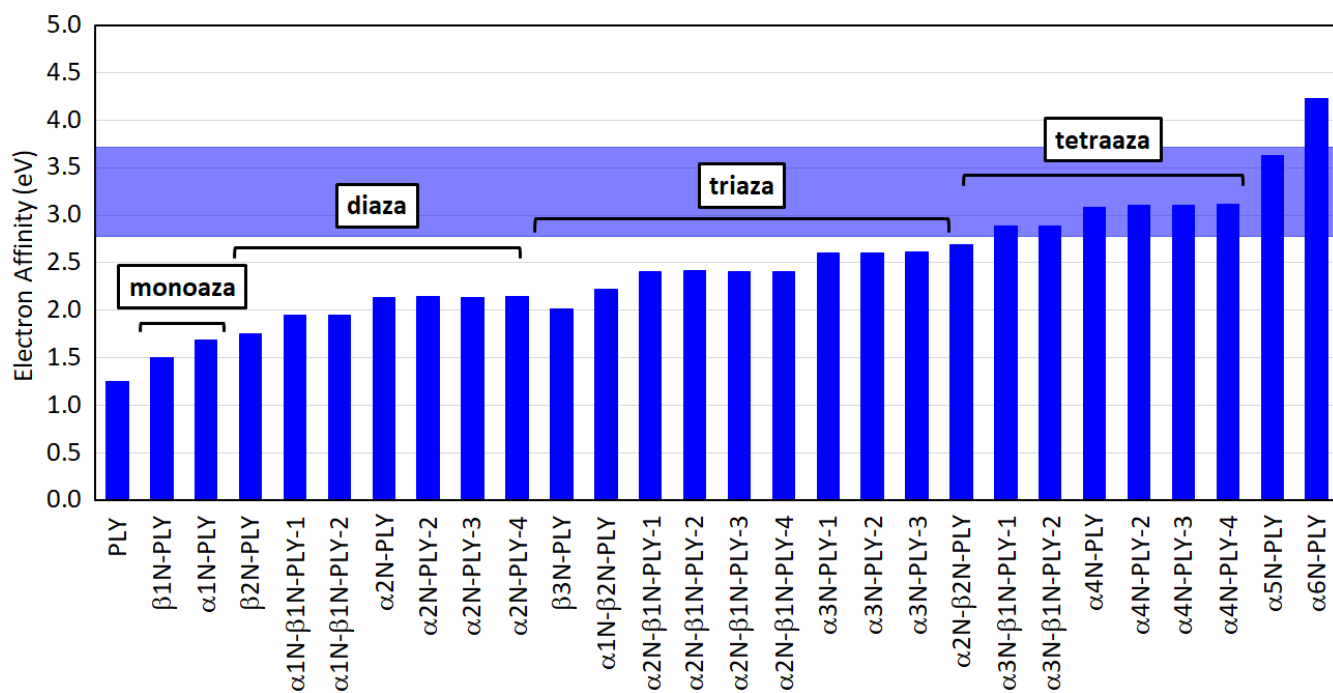

**Figure S8.** Electron affinity (EA) for PLY and its aza-derivatives.

**Table S1.** Internal reorganization energies for hole ( $\lambda^+$ , in meV) and electron ( $\lambda^-$ , in meV) transfer of PLY,  $\beta$ 3N-PLY, and  $\alpha$ 6N-PLY calculated with different functionals.

| Compound        | Functionals <sup>a</sup>                 | $\lambda^+$ | $\lambda^-$ |
|-----------------|------------------------------------------|-------------|-------------|
| PLY             | BLYP                                     | 15          | 32          |
|                 | B3LYP                                    | 19          | 35          |
|                 | $\omega$ B97                             | 30          | 42          |
|                 | OPT-LC- $\omega$ B97( $\omega = 0.246$ ) | 22          | 37          |
| $\beta$ 3N-PLY  | BLYP                                     | 8           | 17          |
|                 | B3LYP                                    | 9           | 18          |
|                 | $\omega$ B97                             | 13          | 20          |
|                 | OPT-LC- $\omega$ B97( $\omega = 0.258$ ) | 10          | 19          |
| $\alpha$ 6N-PLY | BLYP                                     | -           | 56          |
|                 | B3LYP                                    | 58          | 68          |
|                 | $\omega$ B97                             | 66          | 93          |
|                 | OPT-LC- $\omega$ B97( $\omega = 0.302$ ) | 63          | 81          |

<sup>a</sup>Calculated at the 6-31G(d,p) basis set



**Table S2.** Internal reorganization energies (in meV) contributed from each bond length and bond angle in the normal mode (in  $\text{cm}^{-1}$ ) of neutral and cationic states for PLY.

| PLY<br>N-Freq | Bond Length |     |     |              |             | Bond Angle |         |          |          |        |              |             |
|---------------|-------------|-----|-----|--------------|-------------|------------|---------|----------|----------|--------|--------------|-------------|
|               | a           | b   | c   | $\alpha$ -CH | $\beta$ -CH | $\alpha$   | $\beta$ | $\gamma$ | $\delta$ | $\phi$ | $\alpha$ -CH | $\beta$ -CH |
| 627           | 0.0         | 0.1 | 1.1 | 0.0          | 0.0         | 0.1        | 0.0     | 0.0      | 0.0      | 0.2    | 0.0          | 0.0         |
| 788           | 0.0         | 0.0 | 0.2 | 0.0          | 0.0         | 0.2        | 1.6     | 0.0      | 0.0      | 0.0    | 0.5          | 0.5         |
| 1119          | 0.0         | 0.0 | 0.0 | 0.0          | 0.0         | 0.0        | 0.0     | 0.0      | 0.0      | 0.0    | 0.1          | 0.0         |
| 1433          | 0.0         | 0.0 | 0.1 | 0.0          | 0.0         | 0.0        | 0.0     | 0.0      | 0.0      | 0.1    | 0.4          | 0.0         |
| 1561          | 0.0         | 0.0 | 0.0 | 0.0          | 0.0         | 0.0        | 0.1     | 0.0      | 0.0      | 0.0    | 0.3          | 0.0         |
| 3178          | 0.0         | 0.0 | 0.0 | 0.1          | 0.0         | 0.0        | 0.0     | 0.0      | 0.0      | 0.0    | 0.0          | 0.0         |
| 3203          | 0.0         | 0.0 | 0.0 | 0.0          | 0.0         | 0.0        | 0.0     | 0.0      | 0.0      | 0.0    | 0.0          | 0.0         |
| Sum           | 0.0         | 0.1 | 1.4 | 0.1          | 0.0         | 0.4        | 1.7     | 0.1      | 0.0      | 0.3    | 1.3          | 0.5         |

| PLY<br>C-Freq | Bond Length |     |     |              |             | Bond Angle |         |          |          |        |              |             |
|---------------|-------------|-----|-----|--------------|-------------|------------|---------|----------|----------|--------|--------------|-------------|
|               | a           | b   | c   | $\alpha$ -CH | $\beta$ -CH | $\alpha$   | $\beta$ | $\gamma$ | $\delta$ | $\phi$ | $\alpha$ -CH | $\beta$ -CH |
| 630           | 0.0         | 0.1 | 1.0 | 0.0          | 0.0         | 0.1        | 0.0     | 0.0      | 0.0      | 0.2    | 0.0          | 0.0         |
| 789           | 0.0         | 0.0 | 0.2 | 0.0          | 0.0         | 0.2        | 1.7     | 0.0      | 0.0      | 0.0    | 0.5          | 0.5         |
| 1125          | 0.0         | 0.0 | 0.0 | 0.0          | 0.0         | 0.0        | 0.0     | 0.0      | 0.0      | 0.0    | 0.0          | 0.0         |
| 1452          | 0.0         | 0.0 | 0.1 | 0.0          | 0.0         | 0.1        | 0.0     | 0.0      | 0.0      | 0.1    | 0.5          | 0.0         |
| 1570          | 0.0         | 0.0 | 0.0 | 0.0          | 0.0         | 0.0        | 0.1     | 0.0      | 0.0      | 0.0    | 0.3          | 0.0         |
| 3203          | 0.0         | 0.0 | 0.0 | 0.0          | 0.0         | 0.0        | 0.0     | 0.0      | 0.0      | 0.0    | 0.0          | 0.0         |
| 3230          | 0.0         | 0.0 | 0.0 | 0.1          | 0.0         | 0.0        | 0.0     | 0.0      | 0.0      | 0.0    | 0.0          | 0.0         |
| Sum           | 0.0         | 0.1 | 1.4 | 0.1          | 0.0         | 0.4        | 1.7     | 0.1      | 0.0      | 0.3    | 1.4          | 0.5         |

**Table S3.** Internal reorganization energies (in meV) contributed from each bond length and bond angle in the normal mode (in  $\text{cm}^{-1}$ ) of neutral and cationic states for  $\beta$ 3N-PLY.

| $\beta$ 3N-PLY<br>N-Freq | Bond Length |     |     |              |             | Bond Angle |         |          |          |        |              |             |
|--------------------------|-------------|-----|-----|--------------|-------------|------------|---------|----------|----------|--------|--------------|-------------|
|                          | a           | b   | c   | $\alpha$ -CH | $\beta$ -CH | $\alpha$   | $\beta$ | $\gamma$ | $\delta$ | $\phi$ | $\alpha$ -CH | $\beta$ -CH |
| 617                      | 0.0         | 0.0 | 0.2 | 0.0          | —           | 0.2        | 0.0     | 0.0      | 0.0      | 0.0    | 0.0          | —           |
| 797                      | 0.0         | 0.0 | 0.0 | 0.0          | —           | 0.1        | 0.1     | 0.0      | 0.0      | 0.0    | 0.1          | —           |
| 1204                     | 0.0         | 0.0 | 0.0 | 0.0          | —           | 0.0        | 0.0     | 0.0      | 0.0      | 0.0    | 0.2          | —           |
| 1451                     | 0.0         | 0.0 | 0.1 | 0.0          | —           | 0.2        | 0.0     | 0.0      | 0.0      | 0.0    | 0.6          | —           |
| 1528                     | 0.0         | 0.0 | 0.0 | 0.0          | —           | 0.0        | 0.0     | 0.0      | 0.0      | 0.0    | 0.2          | —           |
| 3172                     | 0.0         | 0.0 | 0.0 | 0.0          | —           | 0.0        | 0.0     | 0.0      | 0.0      | 0.0    | 0.0          | —           |
| Sum                      | 0.0         | 0.0 | 0.3 | 0.0          | —           | 0.5        | 0.1     | 0.0      | 0.0      | 0.0    | 1.0          | —           |

| $\beta$ 3N-PLY<br>C-Freq | Bond Length |     |     |              |             | Bond Angle |         |          |          |        |              |             |
|--------------------------|-------------|-----|-----|--------------|-------------|------------|---------|----------|----------|--------|--------------|-------------|
|                          | a           | b   | c   | $\alpha$ -CH | $\beta$ -CH | $\alpha$   | $\beta$ | $\gamma$ | $\delta$ | $\phi$ | $\alpha$ -CH | $\beta$ -CH |
| 616                      | 0.0         | 0.0 | 0.2 | 0.0          | —           | 0.2        | 0.0     | 0.0      | 0.0      | 0.0    | 0.0          | —           |
| 795                      | 0.0         | 0.0 | 0.0 | 0.0          | —           | 0.1        | 0.1     | 0.0      | 0.0      | 0.0    | 0.1          | —           |
| 1208                     | 0.0         | 0.0 | 0.0 | 0.0          | —           | 0.0        | 0.0     | 0.0      | 0.0      | 0.0    | 0.1          | —           |
| 1464                     | 0.0         | 0.0 | 0.2 | 0.0          | —           | 0.2        | 0.0     | 0.0      | 0.0      | 0.0    | 0.7          | —           |
| 1529                     | 0.0         | 0.0 | 0.0 | 0.0          | —           | 0.0        | 0.0     | 0.0      | 0.0      | 0.0    | 0.2          | —           |
| 3186                     | 0.0         | 0.0 | 0.0 | 0.0          | —           | 0.0        | 0.0     | 0.0      | 0.0      | 0.0    | 0.0          | —           |
| Sum                      | 0.0         | 0.0 | 0.3 | 0.0          | —           | 0.5        | 0.1     | 0.0      | 0.0      | 0.0    | 1.0          | —           |

**Table S4.** Internal reorganization energies (in meV) contributed from each bond length and bond angle in the normal mode (in  $\text{cm}^{-1}$ ) of neutral and cationic states for  $\alpha 6\text{N-PLY}$ .

| $\alpha 6\text{N-PLY}$<br>N-Freq | Bond Length |     |     |                    |                   | Bond Angle |         |          |          |        |                    |                   |
|----------------------------------|-------------|-----|-----|--------------------|-------------------|------------|---------|----------|----------|--------|--------------------|-------------------|
|                                  | a           | b   | c   | $\alpha\text{-CH}$ | $\beta\text{-CH}$ | $\alpha$   | $\beta$ | $\gamma$ | $\delta$ | $\phi$ | $\alpha\text{-CH}$ | $\beta\text{-CH}$ |
| 673                              | 0.0         | 0.0 | 0.0 | —                  | 0.0               | 0.0        | 0.0     | 0.0      | 0.0      | 0.0    | —                  | 0.0               |
| 861                              | 0.2         | 0.0 | 0.7 | —                  | 0.0               | 3.5        | 7.0     | 0.1      | 0.0      | 0.2    | —                  | 2.1               |
| 1275                             | 3.0         | 0.0 | 1.2 | —                  | 0.0               | 0.5        | 0.8     | 0.4      | 0.0      | 2.0    | —                  | 0.2               |
| 1534                             | 0.0         | 0.0 | 0.1 | —                  | 0.0               | 0.1        | 0.1     | 0.0      | 0.0      | 0.0    | —                  | 0.0               |
| 3192                             | 0.0         | 0.0 | 0.0 | —                  | 0.2               | 0.0        | 0.0     | 0.0      | 0.0      | 0.0    | —                  | 0.0               |
| Sum                              | 3.2         | 0.0 | 2.1 | —                  | 0.2               | 4.1        | 7.9     | 0.5      | 0.0      | 2.2    | —                  | 2.4               |

| $\alpha 6\text{N-PLY}$<br>C-Freq | Bond Length |     |     |                    |                   | Bond Angle |         |          |          |        |                    |                   |
|----------------------------------|-------------|-----|-----|--------------------|-------------------|------------|---------|----------|----------|--------|--------------------|-------------------|
|                                  | a           | b   | c   | $\alpha\text{-CH}$ | $\beta\text{-CH}$ | $\alpha$   | $\beta$ | $\gamma$ | $\delta$ | $\phi$ | $\alpha\text{-CH}$ | $\beta\text{-CH}$ |
| 674                              | 0.0         | 0.0 | 0.0 | —                  | 0.0               | 0.0        | 0.0     | 0.0      | 0.0      | 0.0    | —                  | 0.0               |
| 848                              | 0.2         | 0.0 | 0.7 | —                  | 0.0               | 3.3        | 6.6     | 0.0      | 0.0      | 0.2    | —                  | 2.0               |
| 1270                             | 3.3         | 0.0 | 1.4 | —                  | 0.0               | 0.5        | 0.9     | 0.5      | 0.0      | 2.2    | —                  | 0.3               |
| 1546                             | 0.0         | 0.0 | 0.1 | —                  | 0.0               | 0.1        | 0.1     | 0.0      | 0.0      | 0.0    | —                  | 0.0               |
| 3230                             | 0.0         | 0.0 | 0.0 | —                  | 0.2               | 0.0        | 0.0     | 0.0      | 0.0      | 0.0    | —                  | 0.0               |
| Sum                              | 3.5         | 0.0 | 2.1 | —                  | 0.2               | 3.9        | 7.6     | 0.6      | 0.0      | 2.4    | —                  | 2.3               |

**Table S5.** Internal reorganization energies (in meV) contributed from each bond length and bond angle in the normal mode (in  $\text{cm}^{-1}$ ) of neutral and anionic states for PLY.

| PLY<br>N-Freq | Bond Length |     |     |                    |                   | Bond Angle |         |          |          |        |                    |                   |
|---------------|-------------|-----|-----|--------------------|-------------------|------------|---------|----------|----------|--------|--------------------|-------------------|
|               | a           | b   | c   | $\alpha\text{-CH}$ | $\beta\text{-CH}$ | $\alpha$   | $\beta$ | $\gamma$ | $\delta$ | $\phi$ | $\alpha\text{-CH}$ | $\beta\text{-CH}$ |
| 627           | 0.0         | 0.5 | 3.3 | 0.0                | 0.0               | 0.6        | 0.0     | 0.1      | 0.0      | 0.5    | 0.0                | 0.0               |
| 788           | 0.0         | 0.0 | 0.4 | 0.0                | 0.0               | 0.6        | 2.5     | 0.0      | 0.0      | 0.0    | 0.6                | 0.8               |
| 1119          | 0.0         | 0.0 | 0.0 | 0.0                | 0.0               | 0.0        | 0.0     | 0.0      | 0.0      | 0.0    | 0.0                | 0.0               |
| 1433          | 0.0         | 0.0 | 0.2 | 0.0                | 0.0               | 0.1        | 0.0     | 0.0      | 0.0      | 0.1    | 0.5                | 0.0               |
| 1561          | 0.0         | 0.0 | 0.0 | 0.0                | 0.0               | 0.0        | 0.1     | 0.0      | 0.0      | 0.0    | 0.4                | 0.0               |
| 3178          | 0.0         | 0.0 | 0.0 | 0.1                | 0.0               | 0.0        | 0.0     | 0.0      | 0.0      | 0.0    | 0.0                | 0.0               |
| 3203          | 0.0         | 0.0 | 0.0 | 0.9                | 0.1               | 0.0        | 0.0     | 0.0      | 0.0      | 0.0    | 0.0                | 0.0               |
| Sum           | 0.0         | 0.6 | 3.9 | 1.0                | 0.1               | 1.4        | 2.7     | 0.1      | 0.0      | 0.6    | 1.5                | 0.8               |

| PLY<br>A-Freq | Bond Length |     |     |                    |                   | Bond Angle |         |          |          |        |                    |                   |
|---------------|-------------|-----|-----|--------------------|-------------------|------------|---------|----------|----------|--------|--------------------|-------------------|
|               | a           | b   | c   | $\alpha\text{-CH}$ | $\beta\text{-CH}$ | $\alpha$   | $\beta$ | $\gamma$ | $\delta$ | $\phi$ | $\alpha\text{-CH}$ | $\beta\text{-CH}$ |
| 622           | 0.0         | 0.5 | 3.5 | 0.0                | 0.0               | 0.7        | 0.0     | 0.1      | 0.0      | 0.5    | 0.0                | 0.0               |
| 784           | 0.0         | 0.0 | 0.3 | 0.0                | 0.0               | 0.6        | 2.4     | 0.0      | 0.0      | 0.0    | 0.6                | 0.7               |
| 1113          | 0.0         | 0.0 | 0.0 | 0.0                | 0.0               | 0.0        | 0.0     | 0.0      | 0.0      | 0.0    | 0.0                | 0.0               |
| 1406          | 0.0         | 0.0 | 0.1 | 0.0                | 0.0               | 0.1        | 0.0     | 0.0      | 0.0      | 0.1    | 0.4                | 0.0               |
| 1552          | 0.0         | 0.0 | 0.0 | 0.0                | 0.0               | 0.0        | 0.1     | 0.0      | 0.0      | 0.0    | 0.4                | 0.0               |
| 3115          | 0.0         | 0.0 | 0.0 | 0.4                | 0.0               | 0.0        | 0.0     | 0.0      | 0.0      | 0.0    | 0.0                | 0.0               |
| 3161          | 0.0         | 0.0 | 0.0 | 0.6                | 0.1               | 0.0        | 0.0     | 0.0      | 0.0      | 0.0    | 0.0                | 0.0               |
| Sum           | 0.0         | 0.6 | 3.9 | 1.0                | 0.1               | 1.4        | 2.5     | 0.1      | 0.0      | 0.6    | 1.4                | 0.8               |

**Table S6.** Internal reorganization energies (in meV) contributed from each bond length and bond angle in the normal mode (in  $\text{cm}^{-1}$ ) of neutral and anionic states for  $\beta$ 3N-PLY.

| $\beta$ 3N-PLY<br>N-Freq | Bond Length |     |     |              |             | Bond Angle |         |          |          |        |              |             |  |
|--------------------------|-------------|-----|-----|--------------|-------------|------------|---------|----------|----------|--------|--------------|-------------|--|
|                          | a           | b   | c   | $\alpha$ -CH | $\beta$ -CH | $\alpha$   | $\beta$ | $\gamma$ | $\delta$ | $\phi$ | $\alpha$ -CH | $\beta$ -CH |  |
| 617                      | 0.0         | 0.1 | 0.6 | 0.0          | —           | 0.8        | 0.2     | 0.0      | 0.0      | 0.0    | 0.1          | —           |  |
| 797                      | 0.0         | 0.0 | 0.1 | 0.0          | —           | 0.2        | 0.3     | 0.0      | 0.0      | 0.0    | 0.1          | —           |  |
| 1204                     | 0.0         | 0.0 | 0.0 | 0.0          | —           | 0.2        | 0.0     | 0.0      | 0.0      | 0.0    | 0.5          | —           |  |
| 1451                     | 0.0         | 0.0 | 0.2 | 0.0          | —           | 0.3        | 0.0     | 0.0      | 0.0      | 0.0    | 0.5          | —           |  |
| 1528                     | 0.0         | 0.0 | 0.0 | 0.0          | —           | 0.0        | 0.0     | 0.0      | 0.0      | 0.0    | 0.4          | —           |  |
| 3172                     | 0.0         | 0.0 | 0.0 | 0.3          | —           | 0.0        | 0.0     | 0.0      | 0.0      | 0.0    | 0.0          | —           |  |
| Sum                      | 0.0         | 0.1 | 0.8 | 0.3          | —           | 1.5        | 0.5     | 0.0      | 0.0      | 0.1    | 1.6          | —           |  |

| $\beta$ 3N-PLY<br>A-Freq | Bond Length |     |     |              |             | Bond Angle |         |          |          |        |              |             |  |
|--------------------------|-------------|-----|-----|--------------|-------------|------------|---------|----------|----------|--------|--------------|-------------|--|
|                          | a           | b   | c   | $\alpha$ -CH | $\beta$ -CH | $\alpha$   | $\beta$ | $\gamma$ | $\delta$ | $\phi$ | $\alpha$ -CH | $\beta$ -CH |  |
| 616                      | 0.0         | 0.1 | 0.6 | 0.0          | —           | 0.8        | 0.2     | 0.0      | 0.0      | 0.0    | 0.1          | —           |  |
| 795                      | 0.0         | 0.0 | 0.1 | 0.0          | —           | 0.2        | 0.2     | 0.0      | 0.0      | 0.0    | 0.1          | —           |  |
| 1200                     | 0.0         | 0.0 | 0.0 | 0.0          | —           | 0.2        | 0.0     | 0.0      | 0.0      | 0.0    | 0.6          | —           |  |
| 1430                     | 0.0         | 0.0 | 0.1 | 0.0          | —           | 0.3        | 0.0     | 0.0      | 0.0      | 0.0    | 0.5          | —           |  |
| 1524                     | 0.0         | 0.0 | 0.0 | 0.0          | —           | 0.0        | 0.0     | 0.0      | 0.0      | 0.0    | 0.4          | —           |  |
| 3129                     | 0.0         | 0.0 | 0.0 | 0.3          | —           | 0.0        | 0.0     | 0.0      | 0.0      | 0.0    | 0.0          | —           |  |
| Sum                      | 0.0         | 0.1 | 0.8 | 0.3          | —           | 1.6        | 0.5     | 0.0      | 0.0      | 0.1    | 1.7          | —           |  |

**Table S7.** Internal reorganization energies (in meV) contributed from each bond length and bond angle in the normal mode (in  $\text{cm}^{-1}$ ) of neutral and anionic states for  $\alpha$ 6N-PLY.

| $\alpha$ 6N-PLY<br>N-Freq | Bond Length |     |     |              |             | Bond Angle |         |          |          |        |              |             |  |
|---------------------------|-------------|-----|-----|--------------|-------------|------------|---------|----------|----------|--------|--------------|-------------|--|
|                           | a           | b   | c   | $\alpha$ -CH | $\beta$ -CH | $\alpha$   | $\beta$ | $\gamma$ | $\delta$ | $\phi$ | $\alpha$ -CH | $\beta$ -CH |  |
| 673                       | 0.1         | 0.1 | 0.6 | —            | 0.0         | 0.0        | 0.0     | 0.0      | 0.0      | 0.1    | —            | 0.0         |  |
| 861                       | 0.1         | 0.0 | 0.7 | —            | 0.0         | 0.4        | 10.5    | 0.0      | 0.0      | 0.2    | —            | 3.2         |  |
| 1275                      | 2.2         | 0.0 | 1.4 | —            | 0.0         | 0.1        | 1.3     | 0.4      | 0.0      | 1.6    | —            | 0.4         |  |
| 1534                      | 0.1         | 0.1 | 0.3 | —            | 0.0         | 0.0        | 0.4     | 0.0      | 0.0      | 0.1    | —            | 0.1         |  |
| 3192                      | 0.0         | 0.0 | 0.0 | —            | 1.7         | 0.0        | 0.0     | 0.0      | 0.0      | 0.0    | —            | 0.0         |  |
| Sum                       | 2.5         | 0.2 | 3.0 | —            | 1.7         | 0.5        | 12.2    | 0.4      | 0.0      | 1.9    | —            | 3.6         |  |

| $\alpha$ 6N-PLY<br>A-Freq | Bond Length |     |     |              |             | Bond Angle |         |          |          |        |              |             |  |
|---------------------------|-------------|-----|-----|--------------|-------------|------------|---------|----------|----------|--------|--------------|-------------|--|
|                           | a           | b   | c   | $\alpha$ -CH | $\beta$ -CH | $\alpha$   | $\beta$ | $\gamma$ | $\delta$ | $\phi$ | $\alpha$ -CH | $\beta$ -CH |  |
| 671                       | 0.1         | 0.1 | 0.7 | —            | 0.0         | 0.0        | 0.0     | 0.0      | 0.0      | 0.1    | —            | 0.0         |  |
| 873                       | 0.1         | 0.0 | 0.8 | —            | 0.0         | 0.4        | 11.0    | 0.0      | 0.0      | 0.2    | —            | 3.3         |  |
| 1279                      | 1.9         | 0.0 | 1.2 | —            | 0.0         | 0.0        | 1.1     | 0.3      | 0.0      | 1.4    | —            | 0.3         |  |
| 1519                      | 0.1         | 0.1 | 0.4 | —            | 0.0         | 0.1        | 0.6     | 0.0      | 0.0      | 0.1    | —            | 0.2         |  |
| 3104                      | 0.0         | 0.0 | 0.0 | —            | 1.4         | 0.0        | 0.0     | 0.0      | 0.0      | 0.0    | —            | 0.0         |  |
| Sum                       | 2.3         | 0.3 | 3.1 | —            | 1.4         | 0.5        | 12.7    | 0.4      | 0.0      | 1.7    | —            | 3.8         |  |
